# Supplementary material
Source: PubMed Central journal article supplement (PMC3641604)
Supplement: cr201347x1.pdf [file cr201347x1.pdf]

**A**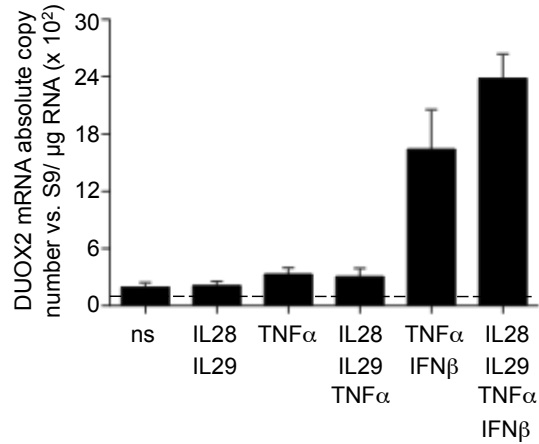**B**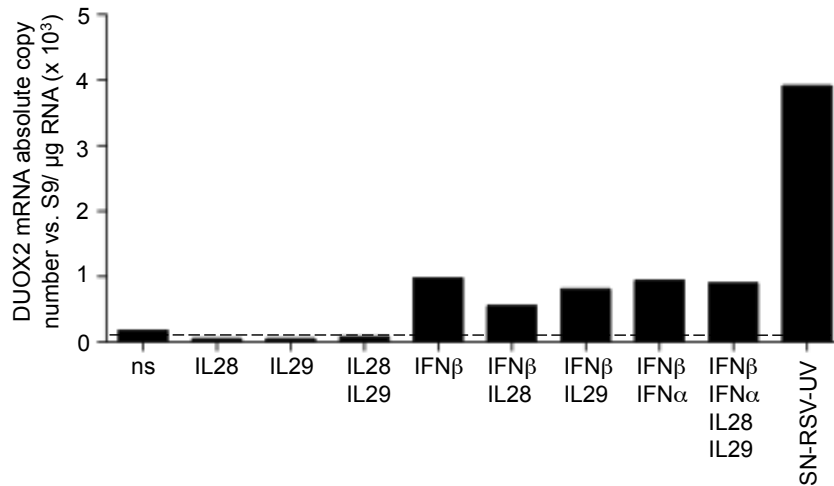

**Supplementary Information, Figure S1: IFN $\lambda$  is not implicated in the induction of DUOX2 expression.**

In **A**, A549 cells were stimulated with combinations of IL28 and IL29 (10ng/mL each), TNF $\alpha$ , and IFN $\beta$  (1000U/mL) for 24h. DUOX2 mRNA expression was analyzed by qRT-PCR. In **B**, A549 cells were stimulated with combinations of IL28, IL29, IFN $\beta$  and IFN $\alpha$  or SN-RSV-UV as in A and DUOX2 mRNA expression was analyzed by qRT-PCR.
