# Supplementary material
Source: PubMed Central journal article supplement (PMC3641604)
Supplement: cr201347x2.pdf [file cr201347x2.pdf]

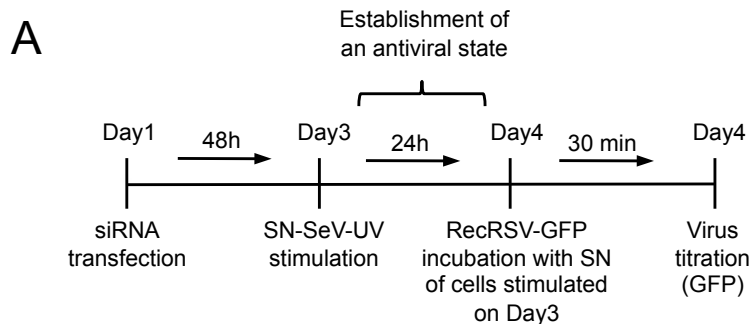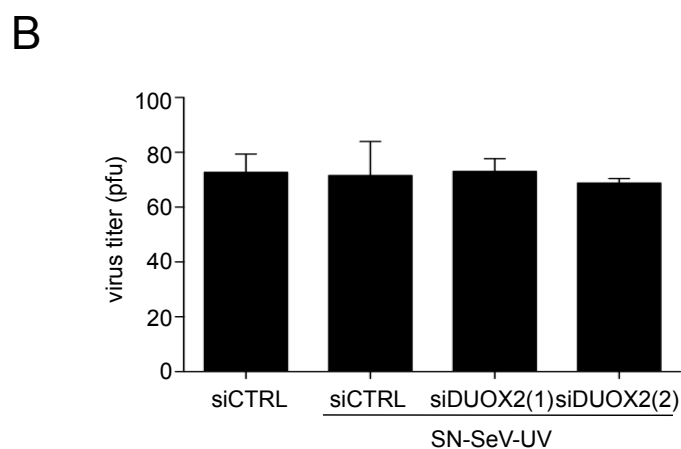

**Supplementary Information, Figure S2: SN-SeV-UV does not have an antiviral effect on RecRSV-GFP.**

In **A**, a schematic outline of the experiment used in **B** is presented. A549 were transfected with siCTRL, siDUOX2(1) or siDUOX2(2), and stimulated with SN-SeV-UV where indicated to establish an antiviral state. 24h post stimulation the supernatant was taken off and incubated, in a cell free system, with RecRSV-GFP for 30 min at 37°C. Then, confluent Vero cells were infected with the incubation mix and a plaque-forming assay was conducted. The results on RecRSV-GFP titer are presented in **B**.
