# Supplementary material
Source: PubMed Central journal article supplement (PMC3641604)
Supplement: cr201347x3.pdf [file cr201347x3.pdf]

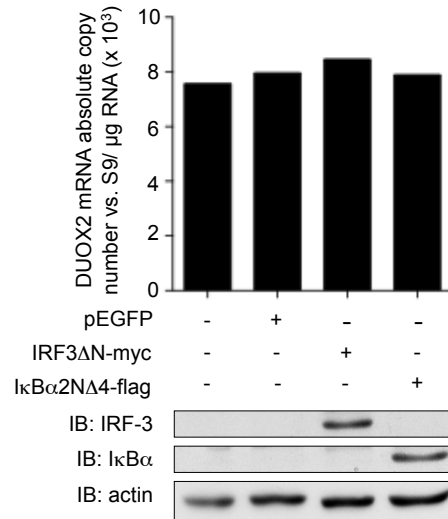

**Supplementary Information, Figure S3: NF-κB and IRF-3 are not implicated in SN-SeV-UV mediated DUOX2 induction**

A549 cells were transfected with dominant negative forms of IRF-3 (IRF3ΔN-myc) and IκBα (IκBα2NΔ4-flag) for 24h before being stimulated with SN-SeV-UV for an additional 24h. DUOX2 expression was analyzed by qRT-PCR. Expression of the dominant negative constructs was evaluated using anti-myc and anti-flag specific antibodies.
