# Supplementary material
Source: PubMed Central journal article supplement (PMC3641604)
Supplement: cr201347x4.pdf [file cr201347x4.pdf]

**Supplementary information, Table S1** siRNA oligonucleotide sequences used for siRNA knockdown

| <b>siRNA</b> | <b>Accession number</b>     | <b>Antisense oligonucleotide sequence (5'-3')</b> |
|--------------|-----------------------------|---------------------------------------------------|
| CTRL         |                             | UGUGAUCAAGGACGCUAUGUU                             |
| STAT1(1)     | NM_139266.2,<br>NM_007315.3 | GGCGUUAGGACCAAGAAGC                               |
| STAT1(2)     | NM_139266.2,<br>NM_007315.3 | GAACCUGACUCCAUGCGG                                |
| STAT2        | NM_198332.1,<br>NM_005419.3 | UAACCAGGCAACUCAGUCCUU                             |
| IRF9         | NM_006084.4                 | UACCUGACCAAGUCUCUGCUU                             |
| IFNAR1(1)    | NM_000629.2                 | ACUAUAGACACCAAUUUUCUU                             |
| IFNAR1(2)    | NM_000629.2                 | UCACUAUUGCCUUAUCUUCUU                             |
| TNFRSF1A     | NM_001065.3                 | UAGUAGUCCUUCAAGCUCUU                              |
| DUOX2(1)     | NM_014080.4                 | UAAACAUUAGACGGGACUUAUCCUC                         |
| DUOX2(2)     | NM_014080.4                 | UUAGGGUUGAGAUCACUCCUU                             |
