# Supplementary material
Source: PubMed Central journal article supplement (PMC3641604)
Supplement: cr201347x5.pdf [file cr201347x5.pdf]

**Supplementary information, Table S2** Primer sequences used in qRT-PCR

analysis

| Gene           | Accession number            | Sense (S)/<br>Antisense (AS) | Sequence (5'-3')                                                            |
|----------------|-----------------------------|------------------------------|-----------------------------------------------------------------------------|
| <i>DUOX2</i>   | NM_014080.4                 | S<br>AS                      | ACCTAAGCAGCTCACA<br>ACTCAGAGAGCAATGATGGTGAT                                 |
| <i>DUOX2</i>   | NM_014080.4                 | S<br>AS                      | GATGGTGACCGCTACTGGT<br>CAGAGAGCAATGATGGTGAT                                 |
| <i>DUOXA2</i>  | NM_207581.3                 | S<br>AS                      | TAACGGCTACAGACAGTGAG<br>CTGCTCTCAACGCTCTGG                                  |
| <i>IFNAR1</i>  | NM_000629.2                 | S<br>AS                      | TGACCAGAAATGAACTGTGTCA<br>TTTAAATAGTTAAGAGCTTGCCCG                          |
| <i>IFNB1</i>   | <a href="#">NM_002176.2</a> | S<br>AS                      | GAACTTTGACATCCCTGAGGAGATTAAGCAG<br>C<br>GTTCTTAGGATTTCCACTCTGACTATGGTC<br>C |
| <i>IFIT1</i>   | NM_001548.3                 | S<br>AS                      | GCCCAGACTTACCTGGACAA<br>GGTTTTCAGGGTCCACTTCA                                |
| <i>IL28A</i>   | <a href="#">NM_172138.1</a> | S<br>AS                      | CTCAGGTTGCATGACTGGTGG<br>GAGGCCTCTGTCACCTTCAAC                              |
| <i>IL29</i>    | <a href="#">NM_172140.1</a> | S<br>AS                      | CTTCCAAGCCCACCACA<br>ACTGCTTGAAGCTCGCTAGCTCCTG                              |
| <i>TNFa</i>    | <a href="#">NM_000594.2</a> | S<br>AS                      | CAGAGGGCCTGTACCTCATC<br>GGAAGACCCCTCCAGATAG                                 |
| <i>S9</i>      | NM_001013.3                 | S<br>AS                      | CGTCTCGACCAAGAGCTGA<br>GGTCCTTCTCATCAAGCGTC                                 |
| <i>β-actin</i> | NM_001101.3                 | S<br>AS                      | GACTTCGAGCAAGAGATGG<br>AGCACTGTGTTGGCGTACAG                                 |
